# Supplementary material for: LncRNA AC007255.1, an immune-related prognostic enhancer RNA in esophageal cancer
Source: PeerJ. 2021 Jul 14;9:e11698. doi: 10.7717/peerj.11698 (PMC8286057; doi:10.7717/peerj.11698)
Supplement: Supplemental Information 5 [file peerj-09-11698-s005.xlsx]

## Sheet: Sheet1
sample	N1	T1	N2	T2	N3	T3	N4	T4	N5	T5	N6	T6	N7	T7	N8	T8	N9	T9	N10	T10	N11	T11	N12	T12
Homo GAPDH	23.0714	23.8641	21.5321	22.3918	22.2222	23.199	22.2693	20.1245	20.5092	20.3902	16.4642	21.4832	21.8595	20.8385	18.0103	19.8686	21.3637	18.592	15.2816	17.7352	17.0869	20.9867	22.3162	21.4706
	23.0789	23.8768	21.5449	22.1983	22.1833	23.214	21.9804	20.2296	20.5989	20.3802	16.4005	21.4725	21.6475	20.9056	18.1355	19.9281	21.4722	18.4634	15.2923	17.6874	16.8814	21.0533	22.1672	21.4185
	23.4989	23.8251	21.4958	22.4557	22.2439	23.2146	21.894	20.1668	20.393	20.3802	16.4702	21.3697	21.9917	20.8268	18.1769	19.7836	21.364	18.4303	15.1116	17.9054	16.9439	20.9855	22.4003	21.4071
average(ct)	23.2164	23.8554	21.5243	22.3486	22.2165	23.2092	22.0479	20.1736	20.5004	20.3835	16.445	21.4418	21.8329	20.857	18.1076	19.8601	21.4	18.4953	15.2285	17.776	16.9708	21.0085	22.2946	21.4321
SD	0.199784	0.0220085	0.0208206	0.109443	0.0250438	0.00722444	0.160481	0.0431914	0.0843169	0.00470071	0.0315499	0.0511691	0.141777	0.0347559	0.0708259	0.0592894	0.0510619	0.0697491	0.0827918	0.0935559	0.0860104	0.0317026	0.0963791	0.027629
Homo AC007255.1	25.0935	26.7887	27.3486	27.8241	28.5738	25.9927	26.0773	22.206	25.7291	28.5917	27.926	27.4589	27.9255	27.716	29.1481	23.3696	32.6974	28.8354	29.4978	26.5486	29.8036	29.6895	28.3057	26.7945
	25.2692	26.6503	27.5559	27.7293	28.4293	25.8762	26.1317	22.33	25.7659	28.287	27.9143	27.5336	27.4495	27.8676	29.4354	23.2775	32.5333	28.9282	29.4684	26.7696	29.9357	29.8611	28.2957	27.0364
	25.1959	26.8732	27.1817	27.4126	28.2378	26.0038	25.8531	22.2485	25.7271	28.4164	27.5089	27.2913	27.5236	27.7126	29.086	23.3496	32.2692	28.5848	29.6844	26.4956	29.9558	29.5038	28.1424	26.8451
average(ct)	25.1862	26.7708	27.3621	27.6554	28.4136	25.9576	26.0207	22.2615	25.7407	28.4317	27.7831	27.4279	27.6328	27.7654	29.2232	23.3322	32.5	28.7828	29.5502	26.6046	29.8983	29.6848	28.2479	26.892
SD	0.0720591	0.0918715	0.153058	0.17595	0.137642	0.0576763	0.120562	0.0514433	0.0178125	0.124852	0.193898	0.101304	0.209126	0.0722715	0.152201	0.03957	0.176382	0.145039	0.0956319	0.118652	0.067515	0.145913	0.0747323	0.104196
PRR15	29.4654	33.6541	31.2596	30.9508	33.8414	30.374	31.6374	23.7411	29.153	30.685	31.3418	29.7061	30.5881	29.9944	31.7863	27.295	33.1612	30.1962	31.551	30.6238	32.5234	30.3309	34.3896	31.8573
	29.7699	33.5928	31.5784	30.7309	34.1155	30.5796	31.4611	23.4438	29.3817	30.6016	31.2732	29.6662	30.4087	30.4748	31.8734	27.494	32.9981	30.6254	31.7803	30.6806	32.7011	30.5913	34.5505	31.562
	29.5025	33.4142	31.5076	30.7571	33.8386	30.6887	31.5581	23.4197	29.5027	30.9649	31.3121	29.2226	30.8542	30.2903	31.6229	27.5117	32.9299	30.2653	31.4522	30.2087	32.3033	30.6254	34.4784	31.7008
average(ct)	29.5793	33.5537	31.4485	30.8129	33.9318	30.5474	31.5522	23.5349	29.3458	30.7505	31.3091	29.5316	30.617	30.2532	31.7609	27.4336	33.0297	30.3623	31.5945	30.5044	32.5093	30.5159	34.4729	31.7067
SD	0.135617	0.101745	0.136676	0.0980812	0.129897	0.1305	0.072076	0.146183	0.145026	0.15537	0.0280778	0.219153	0.183026	0.197885	0.103828	0.0982516	0.0970386	0.188173	0.137419	0.21033	0.162727	0.131506	0.0657939	0.120635
